# Supplementary material for: Elevated Levels of Activated and Pathogenic Eosinophils Characterize Moderate-Severe House Dust Mite Allergic Rhinitis
Source: J Immunol Res. 2020 Aug 13;2020:8085615. doi: 10.1155/2020/8085615 (PMC7443015; doi:10.1155/2020/8085615)
Supplement: Supplementary Materials — Figure S1: increased TNSS, total cell count, and eosinophils in subjects with moderate-severe allergic rhinitis. (a) TNSS. (b) Total cell count in the nose by nasal brushing. (c) Representative images of immunofluorescence staining showing that eosinophils (ECP+ cells, green) in the nose are increased in the moderate-severe patients. TNSS: total nasal symptom score; HC: healthy controls; M-AR: mild allergic rhinitis; MS-AR: moderate-severe allergic rhinitis; ECP: eosinophil cationic protein; DAPI: 4′,6-diamidino-2-phenylindole (blue). Figure S2: percentages of CD101-, CD274-, and both CD101- and CD274-expressing eosinophils in the peripheral blood (a) and nose (b). HC: healthy controls; M-AR: mild allergic rhinitis; MS-AR: moderate-severe allergic rhinitis. Figure S3: relationship between TNSS and eosinophil subsets in patients with allergic rhinitis. Correlation of TNSS with CD44+, CD69+ and CD101+CD274+ eosinophil count in the blood (a) and nose (b). TNSS: total nasal symptom score. Figure S4: relationship between eosinophil granule proteins and eosinophil subsets in patients with allergic rhinitis. Correlation of serum ECP (a) and EPX (b) concentrations with TNSS, total, CD44+, CD69+, and CD101+CD274+ eosinophil count in the blood. TNSS: total nasal symptom score; ECP: eosinophil cationic protein; EPX: eosinophil peroxidase. Figure S5: purity of eosinophils isolated from the peripheral blood. Representative flow cytometry plots showing that the purity of eosinophils was greater than 96%. [file 8085615.f1.pdf]

## Supplementary Materials

**Figure S1. Increased TNSS, total cell count and eosinophils in subjects with moderate-severe allergic rhinitis.** (A) TNSS. (B) Total cell count in nose by nasal brushing. (C) Representative images of immunofluorescence staining showing eosinophils (ECP<sup>+</sup> cells, green) in nose are increased in the moderate-severe patients. TNSS, total nasal symptom score. HC, healthy controls. M-AR, mild allergic rhinitis. MS-AR, moderate-severe allergic rhinitis. ECP, eosinophil cationic protein. DAPI, 4',6-diamidino-2-phenylindole (blue).

**Figure S2. Percentages of CD101-, CD274-, and both CD101- and CD274-expressing eosinophils in peripheral blood (A) and nose (B).** HC, healthy controls. M-AR, mild allergic rhinitis. MS-AR, moderate-severe allergic rhinitis.

**Figure S3. Relationship between TNSS and eosinophil subsets in patients with allergic rhinitis.** Correlation of TNSS with CD44<sup>+</sup>, CD69<sup>+</sup> and CD101<sup>+</sup>CD274<sup>+</sup> eosinophil count in blood (A) and nose (B). TNSS, total nasal symptom score.

**Figure S4. Relationship between eosinophil granule proteins and eosinophil subsets in patients with allergic rhinitis.** Correlation of serum ECP (A) and EPX (B) concentrations with TNSS, total, CD44<sup>+</sup>, CD69<sup>+</sup> and CD101<sup>+</sup>CD274<sup>+</sup> eosinophil count in blood. TNSS, total nasal symptom score. ECP, eosinophil cationic protein. EPX, eosinophil peroxidase.

**Figure S5. Purity of eosinophils isolated from peripheral blood.** Representative flow-cytometry plots showing the purity of eosinophils were greater than 96%.

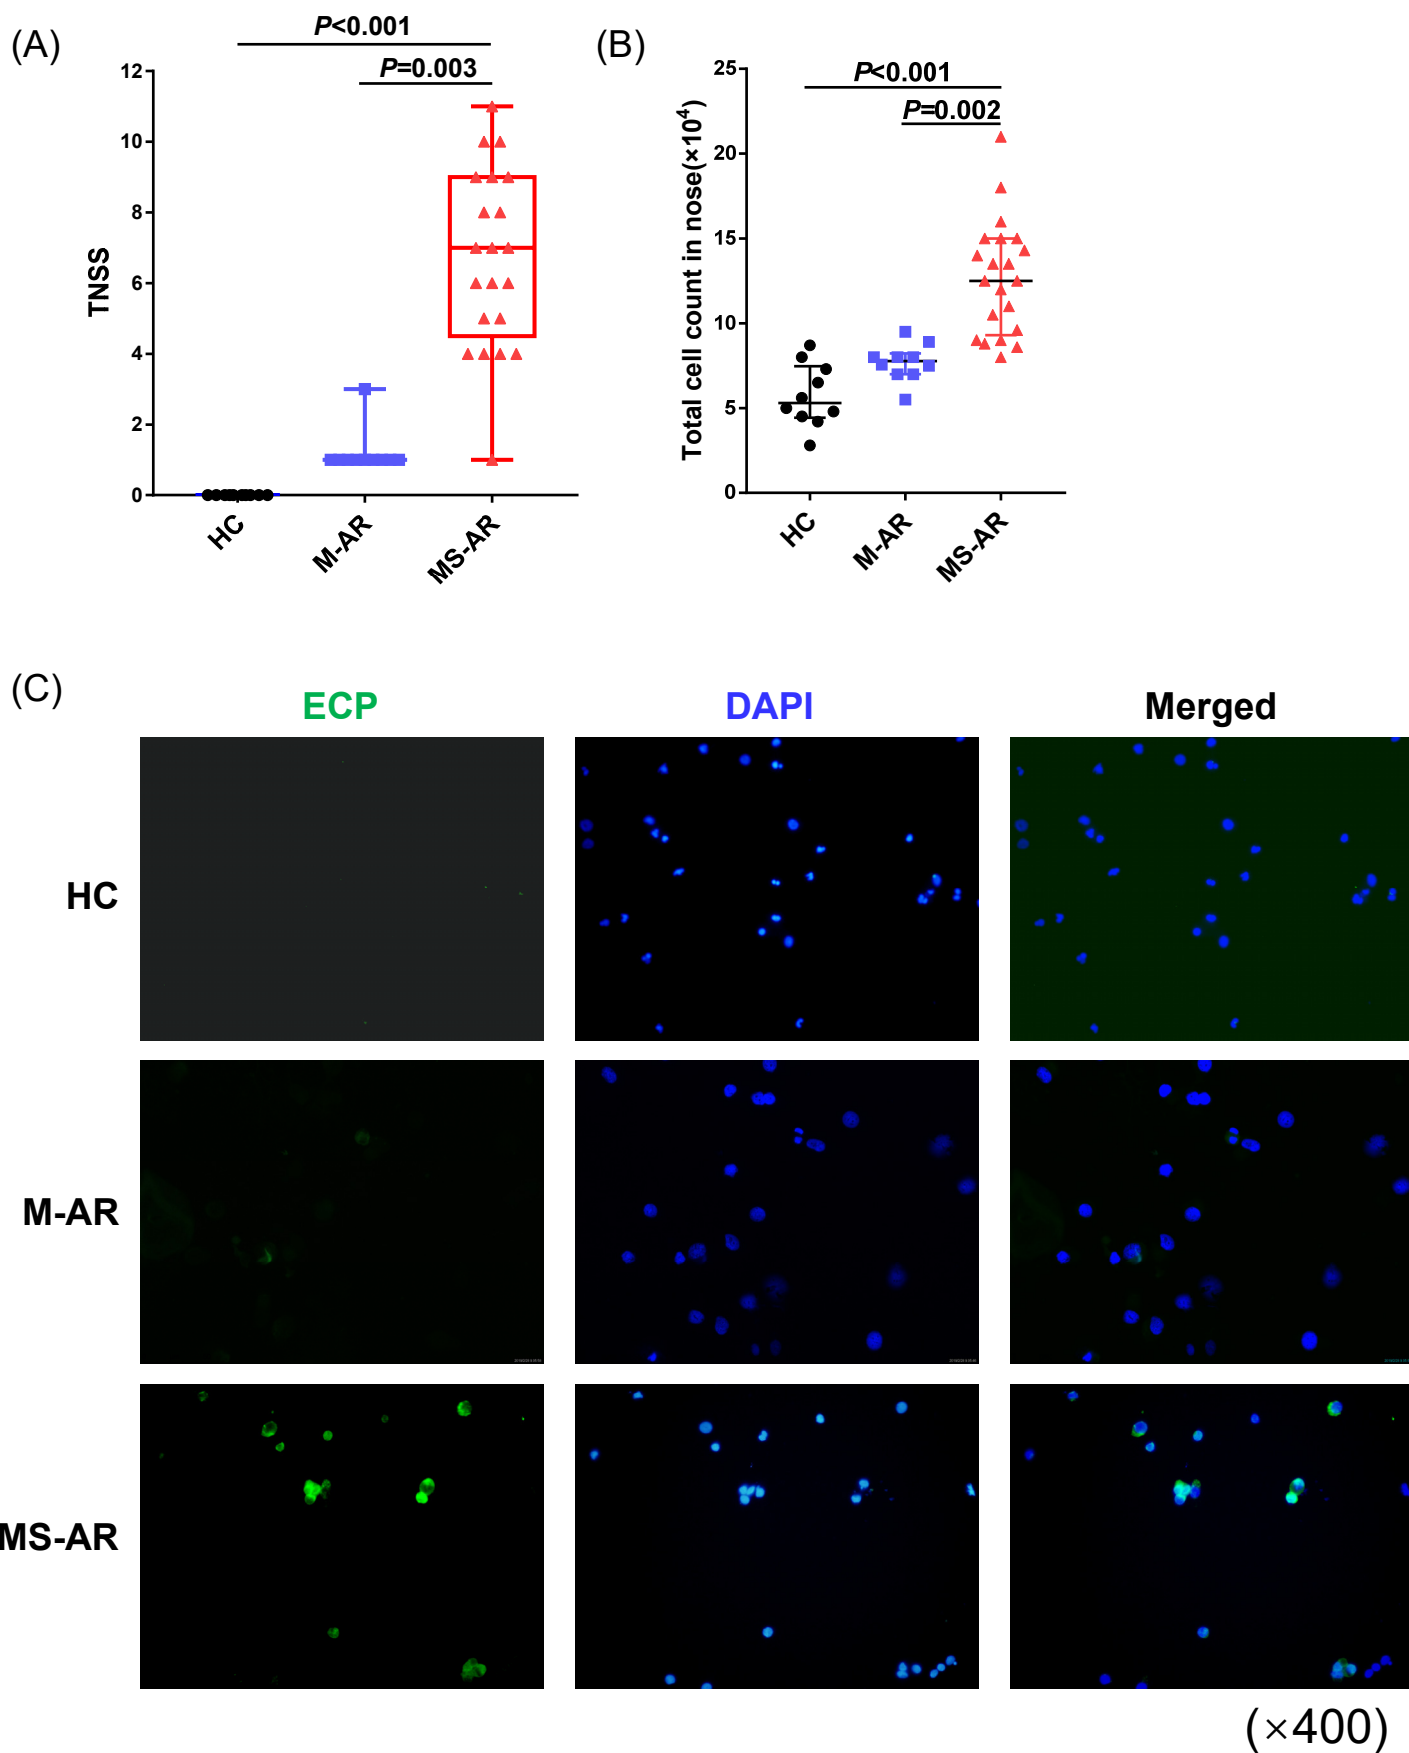

Figure S1

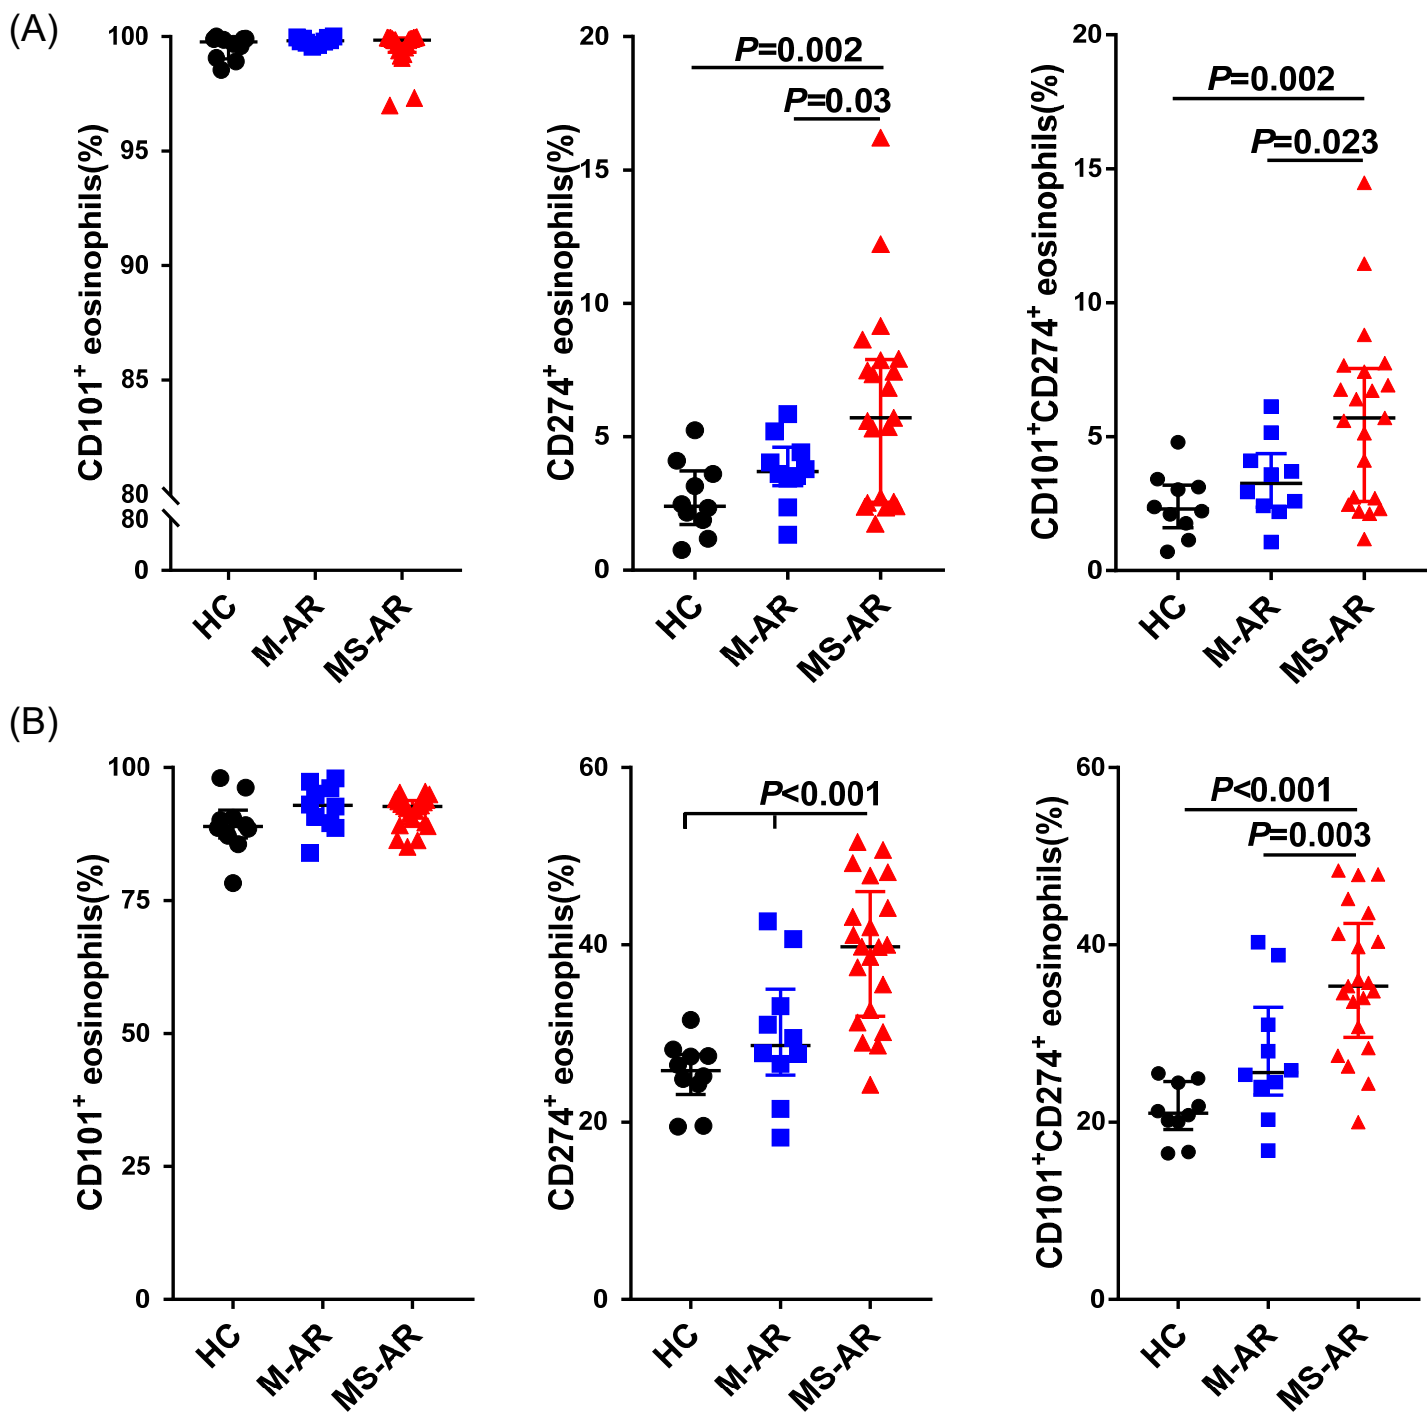

Figure S2

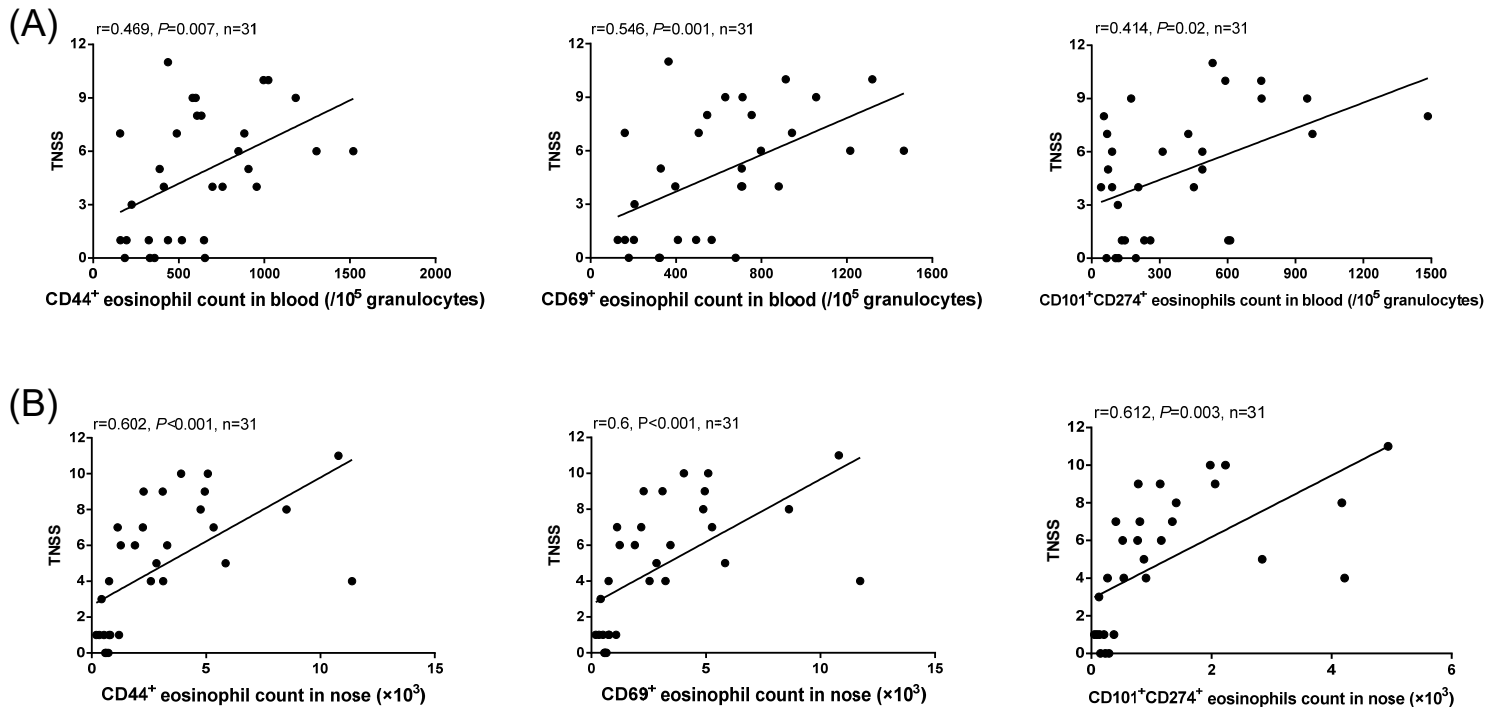

**Figure S3**

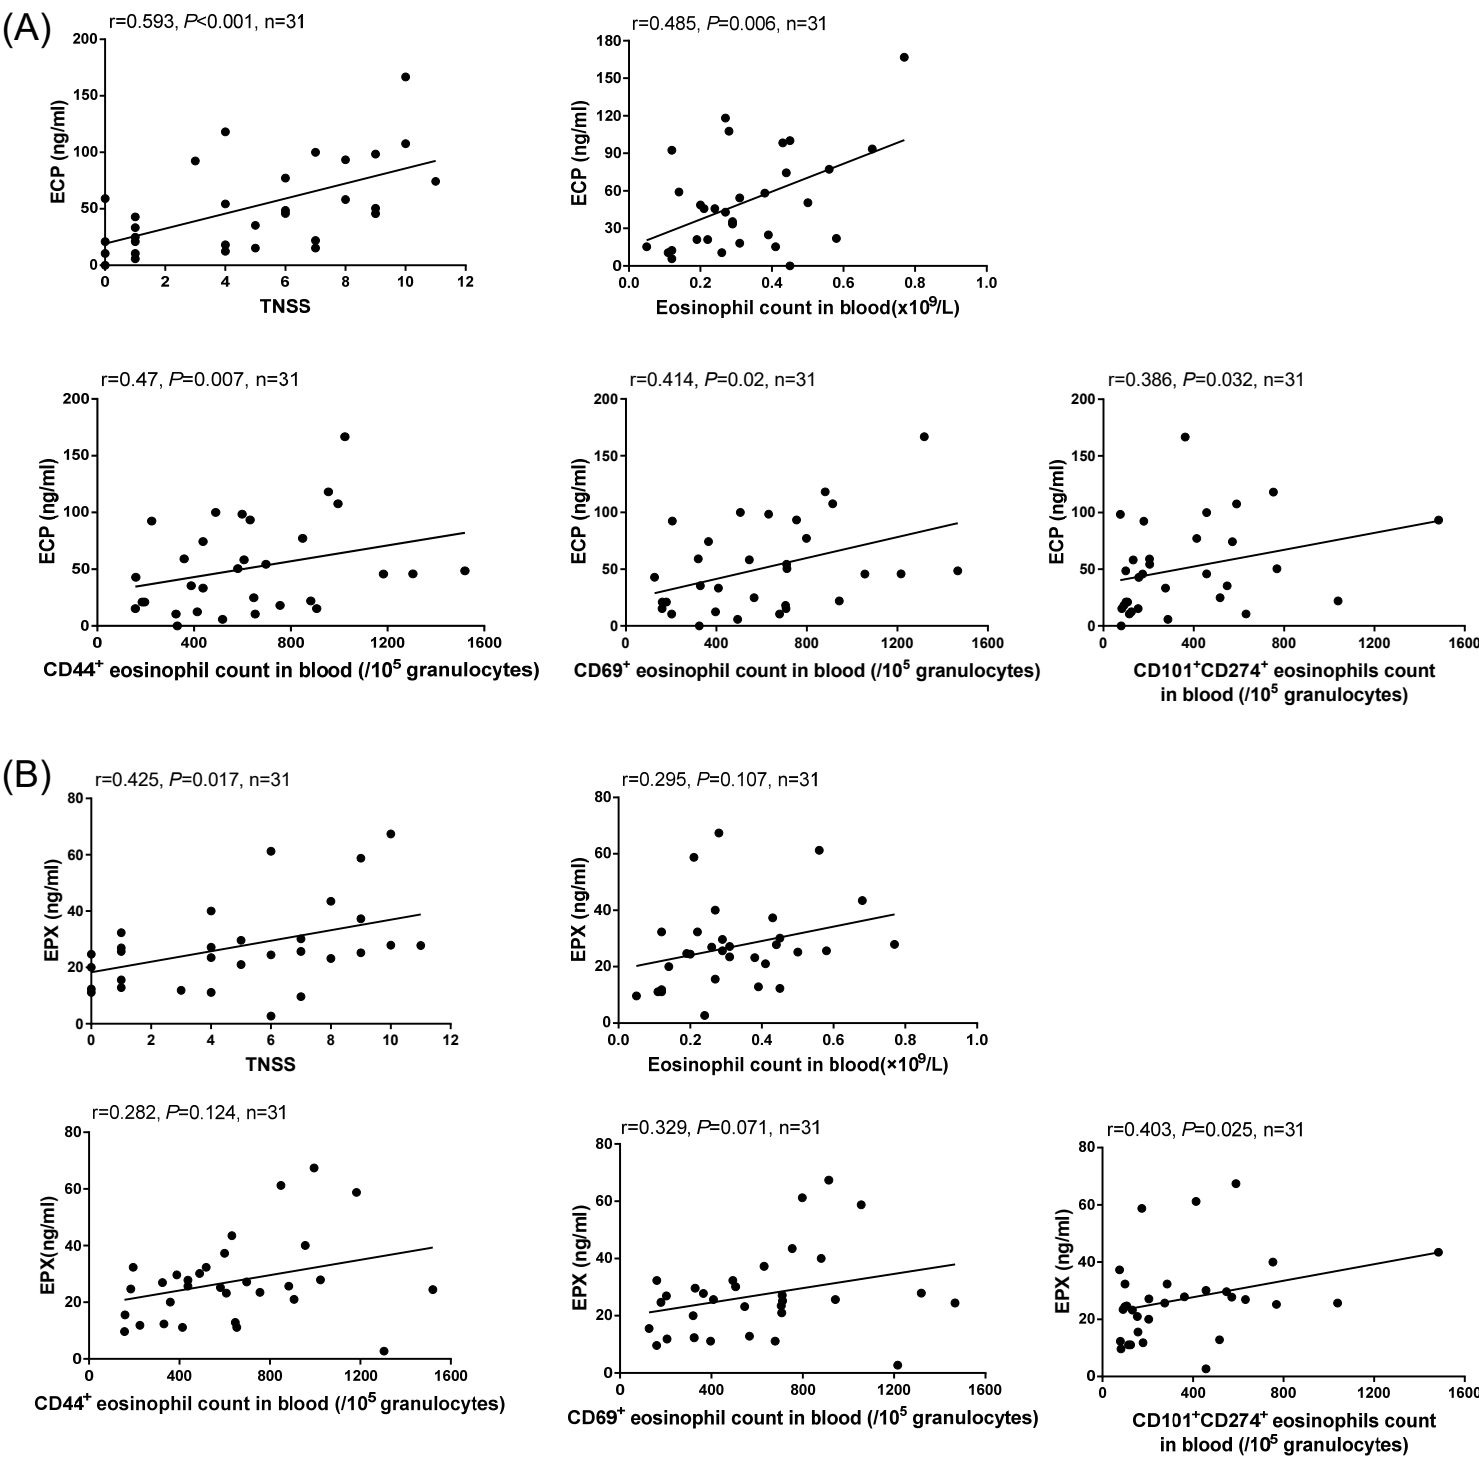

Figure S4

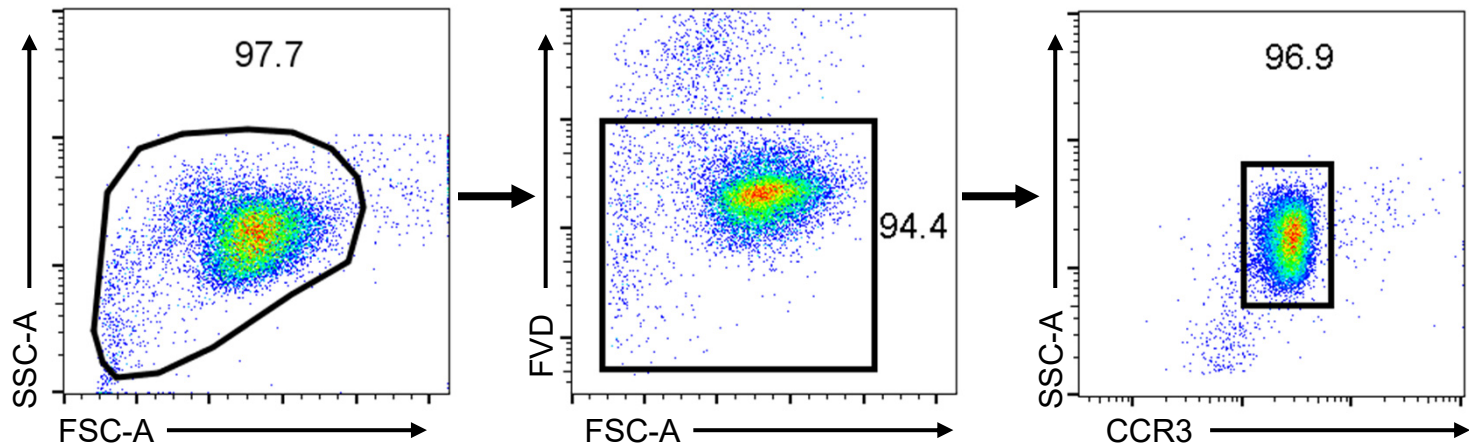

**Figure S5**
